# Supplementary material
Source: Springer Nature journal article supplement (https://www.springermedizin.de/resource/supplementary/12889_2008_1291_MOESM4_ESM.pdf/9502876)

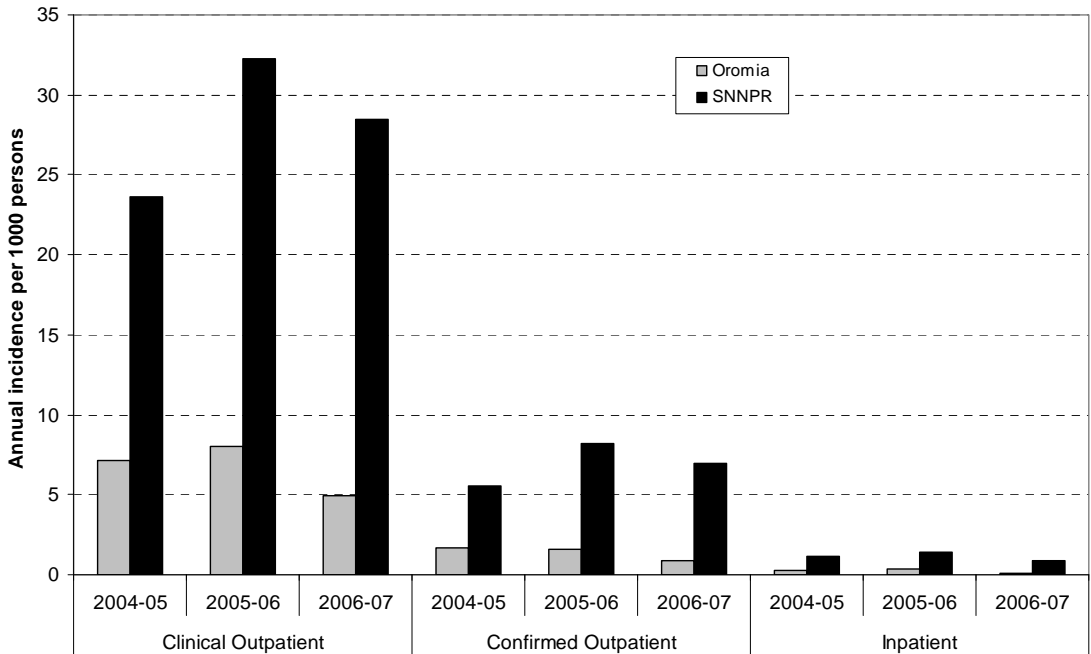

Supplement: MOESM4 [file 9502876]
